# Supplementary material for: Protective effects of chlorogenic acid on trimethyltin chloride-induced neurobehavioral dysfunctions in mice relying on the gut microbiota
Source: Royal Society of Chemistry journal article supplement (doi:10.1039/d1fo03334d), 2021-12-31
Supplement: d1fo03334d1.pdf [file d1fo03334d1.pdf]

**Supporting Information**

**Protective Effects of Chlorogenic Acid on Trimethyltin Chloride-Induced  
Neurobehavioral Dysfunctions in Mice Relying on Gut Microbiota**

*Yu Xi, He Li, Meihong Yu, Xuejie Li, Yan Li, Bowen Hui, Xiangquan Zeng, Jing Wang\*,  
Jian Li\**

*Beijing Advanced Innovation Center for Food Nutrition and Human Health, Beijing  
Technology and Business University, NO. 33 Fucheng Road, Beijing, 100048, China*

*\* Correspondent to:*

*Jian Li, Fax/Telephone: ,86-010-68984446, Email: lijian@btbu.edu.cn (J.L.);*

*Jing Wang, Fax/Telephone: 86-010-68984031, Email: wangjing@th.btbu.edu.cn  
(J.W.)*

## EXPERIMENTAL SECTION

### LC-MS analysis

The LC-MS analysis of phenolic metabolites, related organic acids, and SCFAs was carried out as previously described.<sup>1-5</sup> The analysis was performed on a UPLC-Orbitrap-MS-system consisting of a Thermo Q Exactive coupled to a Thermo Vanquish HPLC system equipped with an autoinjector and a binary solvent delivery system (Thermo, USA). For phenolic metabolites analysis, 50 mg brain tissue was homogenized with 200  $\mu$ L extraction solution (Methanol: chloroform = 7:3) on ice for 30 min, then mixed well with 200  $\mu$ L H<sub>2</sub>O, following centrifuge at 12,000 rpm for 10 min at 4 °C, remove the supernatant, and repeat the extraction once. Combined extractions were lyophilized, then added with 200  $\mu$ L of methanol, centrifuged at 12000 rpm for 10 min at 4 °C, and collect the supernatant. For related organic acids and SCFAs analysis, the extraction method was the same as above, except for adding 10  $\mu$ L EDC (0.1M) and 10  $\mu$ L 3NPH (0.1M) per 40  $\mu$ L extract solution for derivatization. Two complimentary chromatographic columns were used, including Water Acquity UPLC HSS T3 column (50 mm  $\times$  2.1 mm, 1.8  $\mu$ m; Waters, USA) and Water Acquity BEH C18 column (50 mm  $\times$  2.1 mm, 1.8  $\mu$ m; Waters, USA). For HSS T3, the mobile phase composed of phase A (0.1 % formic acid aqueous solution) and phase B (0.1 % formic acid acetonitrile) was at a flow rate of 0.3 mL/min. The gradient program was as follows, 0 min, 10% B; 2 min, 10% B; 6 min, 60% B; 8 min, 60% B; 8.1 min, 60% B; 12 min, 10%B. As of BEH C18, the mobile phase composed of phase A (0.1 % formic acid aqueous solution) and phase B (0.1 % formic acid acetonitrile) at a flow rate of 0.35 mL/min. The gradient program was as follows, 0 min, 10% B; 2 min, 10% B; 12 min, 90% B; 14 min, 90% B; 14.1 min, 10% B; 16 min, 10%B. All the column temperatures were 40 °C. HRMS data were recorded on a Q Exactive hybrid Q-Orbitrap mass spectrometer equipped with a heated ESI source (Thermo Fisher Scientific) utilizing the SIM MS or Fullms-ms2 acquisition methods. The ESI source parameters were set as follows: spray voltage, -2.8 kV/3.0 kV; sheath gas pressure, 40 arb; aux gas pressure, 10 arb; sweep gas pressure, 0 arb; capillary temperature, 320°C; and aux gas heater temperature, 350°C. We have performed validation experiments

such as Retention time, Linear equations, Correlation coefficient, Linear Range, LOQ, see the Table S1 for details. Standard products used for the quantitative study were purchased from Sigma Co. (St. Louis, USA).

**Table S1.** Details for quantification of phenolic metabolites and related organic acids.

| <b>Compounds</b>                         | <b>Retention<br/>time (min)</b> | <b>Calibration</b> | <b>Fit</b> | <b>Range<br/>ng/mL</b> | <b>LOQ<br/>ng/mL</b> |
|------------------------------------------|---------------------------------|--------------------|------------|------------------------|----------------------|
| Chlorogenic acid                         | 4.900                           | Y = 9.427e4X       | 0.9983     | 10-5000                | 10                   |
| Neochlorogenic acid                      | 3.820                           | Y = 1.357e5X       | 0.9989     | 10-5000                | 10                   |
| Cryptochlorogenic acid                   | 5.080                           | Y = 1.409e5X       | 0.9972     | 10-5000                | 10                   |
| 3,4-Dicaffeoylquinic<br>acid             | 6.650                           | Y = 7.198e4X       | 0.9919     | 10-5000                | 10                   |
| 4,5-Dicaffeoylquinic<br>acid             | 6.900                           | Y = 8.048e4X       | 0.9973     | 10-5000                | 10                   |
| 3,5-dicaffeoylquinic acid                | 6.770                           | Y = 7.123e4X       | 0.9978     | 10-5000                | 1                    |
| Phe(L-Phenylalanine)                     | 1.940                           | Y = 5.93e4X        | 0.9942     | 1-5000                 | 1                    |
| Protocatechualdehyde                     | 4.900                           | Y = 2.81e5X        | 0.9971     | 5-3000                 | 5                    |
| Catechin                                 | 5.100                           | Y = 1.133e5X       | 0.9963     | 0.5-300                | 0.5                  |
| Vanillic acid                            | 5.500                           | Y = 1.168e5X       | 0.9975     | 5-3000                 | 5                    |
| Caffeic acid                             | 5.530                           | Y = 1.484e5X       | 0.9980     | 5-3000                 | 5                    |
| Syringic acid                            | 5.710                           | Y = 1.084e5X       | 0.9959     | 0.5-300                | 0.5                  |
| L-Epicatechin                            | 5.740                           | Y = 1.435e5X       | 0.9990     | 0.5-300                | 0.5                  |
| p-Hydroxycinnamic<br>Acid                | 6.380                           | Y = 5.249e4X       | 0.9970     | 5-3000                 | 5                    |
| 4-Hydroxybenzoic acid                    | 6.420                           | Y = 2.197e4X       | 0.9950     | 5-3000                 | 5                    |
| Vanillin                                 | 6.420                           | Y = 1.157e5X       | 0.9954     | 5-3000                 | 5                    |
| Syringaldehyde                           | 6.620                           | Y = 1.832e5X       | 0.9961     | 5-3000                 | 5                    |
| 4-Hydroxy-3,5-<br>dimethoxycinnamic acid | 6.680                           | Y = 1.333e5X       | 0.9941     | 5-3000                 | 5                    |

|                                  |        |                |        |           |     |
|----------------------------------|--------|----------------|--------|-----------|-----|
| Ferulic Acid                     | 6.680  | $Y = 9.3e4X$   | 0.9962 | 5-3000    | 5   |
| Hydrocinnamic acid               | 8.120  | $Y = 9.846e4X$ | 0.9958 | 5-3000    | 5   |
| Trans-Cinnamic acid              | 8.160  | $Y = 8.448e4X$ | 0.9966 | 5-3000    | 5   |
| 3,4-Dihydroxybenzoic acid        | 3.470  | $Y = 8.38e4X$  | 0.9987 | 0.5-5000  | 5   |
| Gallic acid                      | 1.710  | $Y = 2.886e3X$ | 0.9982 | 1-5000    | 1   |
| 3-Hydroxy-4-methoxycinnamic acid | 5.190  | $Y = 2.009e5X$ | 0.9975 | 0.5-1000  | 0.5 |
| Dihydrocaffeic acid              | 5.250  | $Y = 1.812e5X$ | 0.9966 | 1-1000    | 1   |
| 3-Hydroxy-3-phenylpropionic acid | 6.190  | $Y = 1.553e5X$ | 0.9982 | 0.5-1000  | 0.5 |
| Hippuric acid                    | 6.830  | $Y = 9.619e4X$ | 0.9975 | 0.5-1000  | 0.5 |
| Lactic acid                      | 3.560  | $Y = 1.11e5X$  | 0.9988 | 50-20000  | 50  |
| D(-)-Tartaric acid               | 7.390  | $Y = 3.067e5X$ | 0.9966 | 50-15000  | 50  |
| Itaconic acid                    | 8.890  | $Y = 4.431e4X$ | 0.9972 | 50-20000  | 50  |
| Succinic acid                    | 8.510  | $Y = 1.489e4X$ | 0.9918 | 50-15000  | 50  |
| Malonic acid                     | 8.510  | $Y = 1.281e5X$ | 0.9956 | 50-15000  | 50  |
| Glutaric acid                    | 8.910  | $Y = 7.771e3X$ | 0.9949 | 50-15000  | 50  |
| Adipic acid                      | 9.170  | $Y = 7.034e3X$ | 0.9963 | 50-20000  | 50  |
| Benzoic acid                     | 9.340  | $Y = 1.912e5X$ | 0.9941 | 50-5000   | 50  |
| Oxalic acid                      | 9.600  | $Y = 1.6e4X$   | 0.9992 | 50-20000  | 50  |
| Pimelic acid                     | 9.650  | $Y = 4.911e3X$ | 0.9966 | 50-20000  | 50  |
| DL-isocitrate                    | 10.100 | $Y = 1.101e3X$ | 0.9978 | 100-20000 | 100 |
| Salicylic acid                   | 10.140 | $Y = 6.213e4X$ | 0.9966 | 50-20000  | 50  |
| Citric acid                      | 10.570 | $Y = 1.647e3X$ | 0.9980 | 100-20000 | 100 |
| Octanoic acid                    | 12.750 | $Y = 5.622e4X$ | 0.9934 | 50-20000  | 50  |
| Shikimic acid                    | 2.170  | $Y = 4.358e4X$ | 0.9976 | 50-5000   | 50  |
| Quinic acid                      | 2.330  | $Y = 8.723e4X$ | 0.9935 | 50-10000  | 50  |
| Malic acid                       | 8.030  | $Y = 1.077e5X$ | 0.9958 | 50-2000   | 50  |

|                      |        |                |        |          |    |
|----------------------|--------|----------------|--------|----------|----|
| Fumaric acid         | 9.310  | $Y = 1.907e5X$ | 0.9957 | 50-10000 | 50 |
| Maleic acid          | 9.450  | $Y = 2.764e4X$ | 0.9988 | 50-20000 | 50 |
| Isobutyric acid      | 7.370  | $Y = 4.577e4X$ | 0.9964 | 50-10000 | 50 |
| Acetic acid          | 2.830  | $Y = 1.072e5X$ | 0.9983 | 50-20000 | 50 |
| 4-Methylvaleric acid | 10.430 | $Y = 6.112e4X$ | 0.9943 | 50-20000 | 50 |
| Isovaleric acid      | 8.930  | $Y = 5.975e4X$ | 0.9954 | 50-20000 | 50 |
| Valeric acid         | 9.200  | $Y = 6.195e4X$ | 0.9964 | 50-20000 | 50 |
| Propionic acid       | 5.890  | $Y = 4.038e4X$ | 0.9950 | 50-15000 | 50 |
| Butyric Acid         | 7.560  | $Y = 6.637e4X$ | 0.9986 | 50-20000 | 50 |
| Hexanoic acid        | 10.600 | $Y = 6.659e4X$ | 0.9966 | 50-20000 | 50 |

Neurotransmitter analysis was carried out as previously described.<sup>6-9</sup> This analysis was performed on a UPLC-MS-system consisting of an AB SCIEX coupled to a Waters ACQUITY UPLC system equipped with an autoinjector and a binary solvent delivery system (Thermo, USA). The sample was accurately weighed in a 2 mL EP tube, 600  $\mu$ L of 10 % formic acid methanol-H<sub>2</sub>O (1:1.V/V) solution was added, then vortexed for 30 s. The sample was placed in a tissue grinder and ground at 60 Hz for 90 s. The supernatant was centrifuged at 12000 rpm for 5 min at 4 °C, 100  $\mu$ L of the supernatant was collected, and 100 ppb of isotope was added accurately. Water Acquity BEH C18 column (50 mm  $\times$  2.1 mm, 1.8  $\mu$ m; Waters, USA) was used at a column temperature at 40°C. The mobile phase composed of phase A (10% methanol solution contains 0.1 % formic acid) and phase B (50% methanol solution contains 0.1 % formic acid) was at a flow rate of 0.4 mL/min. The gradient program was as follows, 0-1 min, 20%-100% B; 1-7 min, 100% B; 7-7.5 min, 100-20% B; 7.5-11 min, 20% B. Mass spectra were obtained using an Acquity UPLC electrospray ionization (ESI). The mass spectrometer was operated in multiple reaction monitoring (MRM) mode. The ESI source parameters were set as follows: capillary voltage was set to 5500 V, collision gas to 6 psi, air curtain gas to 30 psi for, and both atomization gas and auxiliary gas to 50 psi, ion source temperature to 150 °C. Nitrogen, obtained from a nitrogen generator (99.93 %) was

used for desolvation. MRM transitions, cone voltage and collision energy showed in Supplementary materials S3. The collected data is analyzed by TargetLnyx soft. We have performed validation experiments such as Retention time, Linear equations, Correlation coefficient, Linear Range, LOQ, see the Table S1 for details. Standard products used for the quantitative study were purchased from Sigma Co. (St. Louis, USA).

**Table S2.** Details for quantification of neurotransmitters.

| <b>Compounds</b> | <b>Retention time (min)</b> | <b>Calibration</b>       | <b>Fit</b> | <b>Range ng/mL</b> | <b>LOQ ng/mL</b> |
|------------------|-----------------------------|--------------------------|------------|--------------------|------------------|
| GABA             | 4.278                       | $y=0.01062x + 0.007717$  | 0.9955     | 1-250              | 1                |
| HisA             | 3.788                       | $y=0.3402x - 0.01394$    | 0.9965     | 0.5-25             | 0.5              |
| PA               | 5.233                       | $y=0.008861x + 0.003503$ | 0.9902     | 2.5-625            | 2.5              |
| TyrA             | 5.8                         | $y=0.05848x + 0.01049$   | 0.9902     | 0.5-125            | 0.5              |
| Ach              | 4.391                       | $y=0.438x + 0.0009176$   | 0.9979     | 0.2-10             | 0.2              |
| Gln              | 4.352                       | $y=0.02059x + 0.05742$   | 0.9951     | 1~250              | 1                |
| Glu              | 4.429                       | $y=0.01895x + 0.07221$   | 0.9907     | 2~400              | 2                |
| DA               | 4.905                       | $y=0.0234x + 0.01653$    | 0.9935     | 1~125              | 1                |
| His              | 4.043                       | $y=0.07489x + 0.05975$   | 0.9902     | 2~200              | 2                |
| TrpA             | 10.83                       | $y=0.1793x + 0.005723$   | 0.9939     | 0.2~20             | 0.2              |

---

|        |       |                         |        |         |     |
|--------|-------|-------------------------|--------|---------|-----|
| NE     | 4.3   | $y=0.01728x + 0.001421$ | 0.9929 | 2~200   | 2   |
| 5-HT   | 6.472 | $y=0.07062x + 0.006734$ | 0.9931 | 1~100   | 1   |
| Tyr    | 6.206 | $y=0.01564x + 0.02409$  | 0.993  | 2.5~250 | 2.5 |
| E      | 4.41  | $y=0.06843x + 0.002544$ | 0.9907 | 0.5~50  | 0.5 |
| KynA   | 11.47 | $y=0.00426x + 0.003748$ | 0.9929 | 2~250   | 2   |
| 5-HIAA | 11.06 | $y=0.02916x + 0.006752$ | 0.9916 | 1~200   | 1   |
| DOPA   | 5.385 | $y=0.02371x + 0.01353$  | 0.9919 | 2.5~125 | 2.5 |
| Trp    | 10.92 | $y=0.04886x + 0.02733$  | 0.9919 | 0.5~100 | 0.5 |
| XA     | 11.24 | $y=0.05529x - 0.001483$ | 0.9948 | 2~200   | 2   |
| Kyn    | 8.506 | $y=0.01038x + 0.004458$ | 0.992  | 2~400   | 2   |
| VMA    | 8.263 | $y=0.004944x + 0.02613$ | 0.9929 | 25~1000 | 100 |
| 5-HTP  | 7.297 | $y=0.02958x + 0.001283$ | 0.9937 | 0.5~50  | 1   |
| MT     | 13.52 | $y=0.3564x + 0.004971$  | 0.9929 | 0.1~20  | 0.1 |

---

## **Bioinformatic analysis**

Protein target prediction was performed using SEA database (<https://sea.bkslab.org/>), protein association network analysis was performed using STRING (<https://string-db.org/>) and Cytoscape software 3.8.2 (A software environment for integrated models of biomolecular interaction networks.). Cluster analysis was performed using Clustvis ([ClustVis: a web tool for visualizing clustering of multivariate data \(BETA\) \(ut.ee\)](https://clustvis.it.uu.se/)).

## **Western Blot analysis**

Hippocampus tissue homogenates were obtained using RIPA buffer (P0013B, Beyotime) with a 1% protease inhibitor cocktail (4693116001, Roche). The homogenates were centrifuged at 20 000 g for 30 minutes at 4°C, and the supernatants were collected as protein samples. A protein assay kit (P0010, Beyotime) was used to determine the protein concentrations. The samples (50 µg/sample) were solubilized with 5× SLB (P0015, Beyotime), heated at 95°C for 15 minutes, and then subject to 12% SDS-PAGE. Following electrophoresis, the samples were transferred onto polyvinylidene fluoride membranes (1620177, Bio-Rad). The membranes were blocked in 5% nonfat powdered milk in PBS for 2 hours at room temperature. After appropriate antibodies were used for recognition, the immunoreactive bands were quantified using ImageJ software. The information of primary antibodies and secondary antibodies is shown in Table S3.

## **Immunofluorescence analysis**

Mouse brain sections were pretreated in 0.3% H<sub>2</sub>O<sub>2</sub> in PBS for 10 minutes and then incubated in 1% Triton X-100/PBS solution for 30 minutes. All sections were blocked with 10% normal donkey serum and 0.3% Triton X-100/PBS for 2 hours at room temperature, followed by incubation with appropriate antibodies. The staining was visualized with Alexa Fluor conjugated secondary antibodies. Nuclei were stained with DAPI (C1005, Beyotime). The sections were finally mounted on glass slides. All



sections were examined by a confocal laser scanning microscope (LSM 780, Zeiss). The information of primary antibodies and secondary antibodies is shown in Table S3.

**Table S3. Antibodies**

| <b>Resource</b>                                                         | <b>Source</b>             | <b>Identifier</b> |
|-------------------------------------------------------------------------|---------------------------|-------------------|
| PSD 95                                                                  | Abcam                     | ab238135          |
| Synaptophysin                                                           | Abcam                     | ab32127           |
| TLR4                                                                    | Abclone                   | A5258             |
| p-NFκB p65 (ser536)                                                     | Cell Signaling Technology | 13346             |
| NFκB p65                                                                | Cell Signaling Technology | 8242              |
| p-c-Jun (ser73)                                                         | Cell Signaling Technology | 3270              |
| c-Jun                                                                   | Cell Signaling Technology | 9165              |
| p-JNK(Thr183/Tyr185)                                                    | Cell Signaling Technology | 9255              |
| JNK                                                                     | Cell Signaling Technology | 9252              |
| Caspase 9                                                               | Cell Signaling Technology | 9508              |
| Caspase 3                                                               | Cell Signaling Technology | 9664              |
| APP                                                                     | Invitrogen                | MA1-25489         |
| GFAP                                                                    | Abcam                     | ab7260            |
| IBA-1                                                                   | Abcam                     | ab178847          |
| TNF-α                                                                   | Abcam                     | ab215188          |
| IL-1β                                                                   | Cell Signaling Technology | CS12242           |
| ACTB                                                                    | Sigma                     | A5441             |
| GAPDH                                                                   | Abcam                     | ab8245            |
| β-Tublin                                                                | Cell Signaling Technology | 2128              |
| Goat anti-Rabbit IgG<br>(H+L) Cross-Adsorbed<br>Secondary Antibody, HRP | Beyotime                  | A0208             |
| Goat anti-Mouse IgG<br>(H+L) Cross-Adsorbed<br>Secondary Antibody, HRP  | Beyotime                  | A0216             |
| Alexa Fluor 568-conjugated<br>secondary<br>antibodies                   | Invitrogen                | A11011            |
| Alexa Fluor 488-conjugated<br>secondary<br>antibodies                   | Invitrogen                | A32814            |

## RESLUTS

**Table S4.** Concentrations (ng/g) of phenolic metabolites and related organic acids in mouse hippocampus of different groups.

| Compounds                            | Treatments           |                       |                       |
|--------------------------------------|----------------------|-----------------------|-----------------------|
|                                      | Control              | TMT                   | TMT+CGA               |
| Neochlorogenic acid                  | 2.09±0.66a           | 1.73±0.62a            | 1.51±0.39a            |
| Chlorogenic acid                     | 57.30±23.73a         | 44.02±17.71a          | 57.11±51.58a          |
| Cryptochlorogenic acid               | 77.11±44.67a         | 66.45±65.68a          | 57.33±15.68a          |
| 3,4-Dicaffeoylquinic acid            | 646.37±618.61a       | 560.77±636.73a        | 175.45±50.83a         |
| 3,5-dicaffeoylquinic acid            | 786.77±737.27a       | 669.66±703.69a        | 222.75±50.23a         |
| 4,5-Dicaffeoylquinic acid            | 487.74±354.84a       | 304.98±297.58a        | 426.41±137.34a        |
| Gallic acid                          | 5.74±2.21a           | 5.60±3.58a            | 3.17±0.72a            |
| Phe(L-Phenylalanine)                 | 47.10±8.80c          | 62.20±5.52a           | 58.00±3.24ab          |
| 3,4-Dihydroxybenzoic acid            | 1.59±0.70a           | 1.45±0.67a            | 0.83±0.20a            |
| Protocatechualdehyde                 | 40.56±4.96a          | 38.72±4.20a           | 41.73±4.87a           |
| Catechin                             | 0.09±0.07a           | 0.06±0.05ab           | 0.01±0.01bc           |
| Vanillic acid                        | 3.27±1.03c           | 6.47±3.87a            | 5.71±0.93ab           |
| Caffeic acid                         | 5.11±3.60a           | 4.74±3.34a            | 2.73±1.30a            |
| Syringic acid                        | 2.94±1.91b           | 4.43±2.39ab           | 6.84±0.76a            |
| L-Epicatechin                        | 0.64±0.57a           | 0.50±0.53a            | 0.12±0.02a            |
| p-Hydroxycinnamic Acid               | 8.10±3.25a           | 7.96±1.57a            | 9.99±4.15a            |
| 4-Hydroxybenzoic acid                | 66.39±6.24c          | 77.25±6.54ab          | 78.74±7.87a           |
| Vanillin                             | 73.57±6.79b          | 82.26±6.62ab          | 83.63±7.70a           |
| Syringaldehyde                       | 5.80±5.65b           | 14.73±14.40b          | 46.33±5.91a           |
| 4-Hydroxy-3,5-dimethoxycinnamic acid | 2.14±1.40a           | 2.05±1.47a            | 1.55±0.77a            |
| Ferulic Acid                         | 23.82±23.90a         | 10.70±3.25a           | 20.54±17.72a          |
| Hydrocinnamic acid                   | 7.57±1.63a           | 7.27±1.50a            | 8.68±4.21a            |
| Trans-Cinnamic acid                  | 3.41±2.51a           | 3.23±2.28a            | 2.64±0.65a            |
| 3-Hydroxy-4-methoxycinnamic acid     | 10.91±2.69a          | 11.87±2.64a           | 12.62±3.11a           |
| Dihydrocaffeic acid                  | 0.00±0.00a           | 0.00±0.00a            | 0.00±0.00a            |
| 3-Hydroxy-3-phenylpropionic acid     | 0.51±0.15a           | 0.50±0.15a            | 0.52±0.10a            |
| Hippuric acid                        | 8.42±6.63a           | 3.00±0.33b            | 3.70±1.52b            |
| Shikimic acid                        | 1.19±1.74a           | 0.49±1.10a            | 0.00±0.00a            |
| Quinic acid                          | 24.23±15.83a         | 17.10±19.15a          | 19.82±18.48a          |
| Lactic acid                          | 1191187.23±71663.74a | 1068803.62±119048.26a | 1115283.60±195050.93a |
| Itaconic acid                        | 178.05±9.52a         | 148.83±30.02a         | 164.84±44.34a         |
| D(-)-Tartaric acid                   | 33.42±4.83a          | 29.24±11.57a          | 40.70±19.54a          |
| Malic acid                           | 192481.85±9875.16a   | 172264.70±20111.87a   | 179985.95±35044.33a   |
| Succinic acid                        | 32627.35±3255.87a    | 30278.86±10425.68a    | 27649.17±5425.58a     |
| Malonic acid                         | 1003.24±114.26a      | 994.63±119.16a        | 961.14±213.09a        |

|                |                     |                      |                      |
|----------------|---------------------|----------------------|----------------------|
| Glutaric acid  | 31078.48±4838.08a   | 25588.87±3665.18a    | 30521.62±7790.88a    |
| Adipic acid    | 780.23±173.68a      | 729.43±203.92a       | 784.10±203.55a       |
| Benzoic acid   | 55.67±9.37a         | 53.97±5.09a          | 67.63±16.33a         |
| Oxalic acid    | 55037.27±6072.90a   | 44475.69±5446.11b    | 59849.60±7177.52a    |
| Pimelic acid   | 715.42±154.08a      | 695.31±24.72a        | 734.81±302.03a       |
| DL-isocitrate  | 10495.82±2083.90b   | 10595.87±1114.63ab   | 15741.11±6223.93a    |
| Salicylic acid | 11.75±7.56a         | 20.10±7.82a          | 17.59±14.20a         |
| Citric acid    | 237967.20±45293.22b | 260186.36±15210.32ab | 339349.30±103973.20a |
| Octanoic acid  | 253.67±78.46a       | 294.10±35.34a        | 317.00±103.02a       |
| Fumaric acid   | 24359.91±1295.14a   | 27060.48±2733.68a    | 26915.21±5198.01a    |
| Maleic acid    | 131299.36±5655.70a  | 119785.26±25775.97a  | 108739.21±19390.15a  |

Values are expressed as means ± standard deviation. Different superscripts (a-c) in the same row

indicate significant difference ( $p < 0.05$ ).

**Table S5.** Concentrations (ng/g for HisA, Ach, DA, NE, 5-HT, E, 5-HIAA, XA, Kyn, VMA, 5-HTP;  $\mu\text{g/g}$  for GABA, Gln, Glu, His, Tyr, Trp) of neurotransmitters in mouse hippocampus of different groups.

| Compounds | Treatments           |                      |                       |
|-----------|----------------------|----------------------|-----------------------|
|           | Control              | TMT                  | TMT+CGA               |
| HisA      | 2.35 $\pm$ 0.31a     | 2.54 $\pm$ 0.41a     | 2.11 $\pm$ 0.23a      |
| Ach       | 29.76 $\pm$ 2.15b    | 43.76 $\pm$ 7.10a    | 31.91 $\pm$ 4.15b     |
| DA        | 1.07 $\pm$ 2.39a     | 0.00 $\pm$ 0.00a     | 5.32 $\pm$ 7.65a      |
| NE        | 129.97 $\pm$ 27.54a  | 149.44 $\pm$ 36.29a  | 126.58 $\pm$ 33.05a   |
| 5-HT      | 0.00 $\pm$ 0.00a     | 0.16 $\pm$ 0.30a     | 0.03 $\pm$ 0.08a      |
| E         | 6.12 $\pm$ 0.88a     | 7.37 $\pm$ 0.89a     | 6.13 $\pm$ 1.25a      |
| 5-HIAA    | 63.08 $\pm$ 15.46a   | 75.38 $\pm$ 19.35a   | 62.03 $\pm$ 22.62a    |
| XA        | 9.58 $\pm$ 14.25a    | 0.00 $\pm$ 0.00a     | 0.00 $\pm$ 0.00a      |
| Kyn       | 0.00 $\pm$ 0.00b     | 3.09 $\pm$ 2.80a     | 0.09 $\pm$ 0.20b      |
| 5-HTP     | 2.11 $\pm$ 0.92a     | 1.60 $\pm$ 0.67a     | 1.62 $\pm$ 1.37a      |
| GABA      | 998.53 $\pm$ 67.25a  | 984.35 $\pm$ 113.33a | 1000.54 $\pm$ 105.99a |
| Gln       | 748.66 $\pm$ 71.38a  | 913.75 $\pm$ 114.63a | 926.89 $\pm$ 146.72a  |
| Glu       | 741.55 $\pm$ 160.68a | 699.50 $\pm$ 131.22a | 690.50 $\pm$ 72.38a   |
| His       | 42.63 $\pm$ 4.56a    | 39.23 $\pm$ 3.51a    | 40.81 $\pm$ 9.51a     |
| Tyr       | 55.11 $\pm$ 1.75a    | 47.65 $\pm$ 8.20a    | 53.47 $\pm$ 9.91a     |
| Trp       | 17.15 $\pm$ 1.12a    | 16.91 $\pm$ 2.77a    | 16.80 $\pm$ 3.10a     |

Values are expressed as means  $\pm$  standard deviation. Different superscripts (a–b) in the same row indicate significant difference ( $p < 0.05$ ).

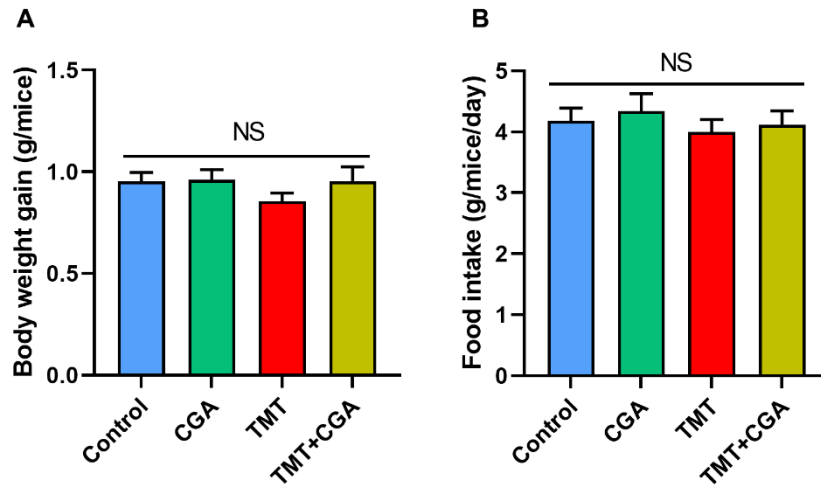

**Figure S1** (A) Body weight gain and (B) food intake of mice with different treatments (n=16 per group) during the experiment. The values are represented as the mean  $\pm$  SEM. NS, no significance.

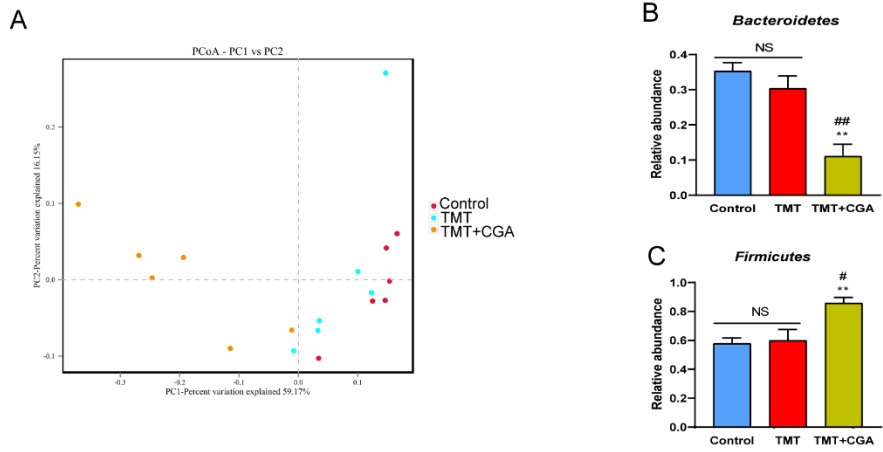

**Figure S2.**

(A) Principal coordinates (PCoA) analysis based on weighted\_unifrac algorithm. (B) Relative abundance of *Bacteroidetes* in mice with different treatments. (C) Relative abundance of *Firmicutes* in mice with different treatments.

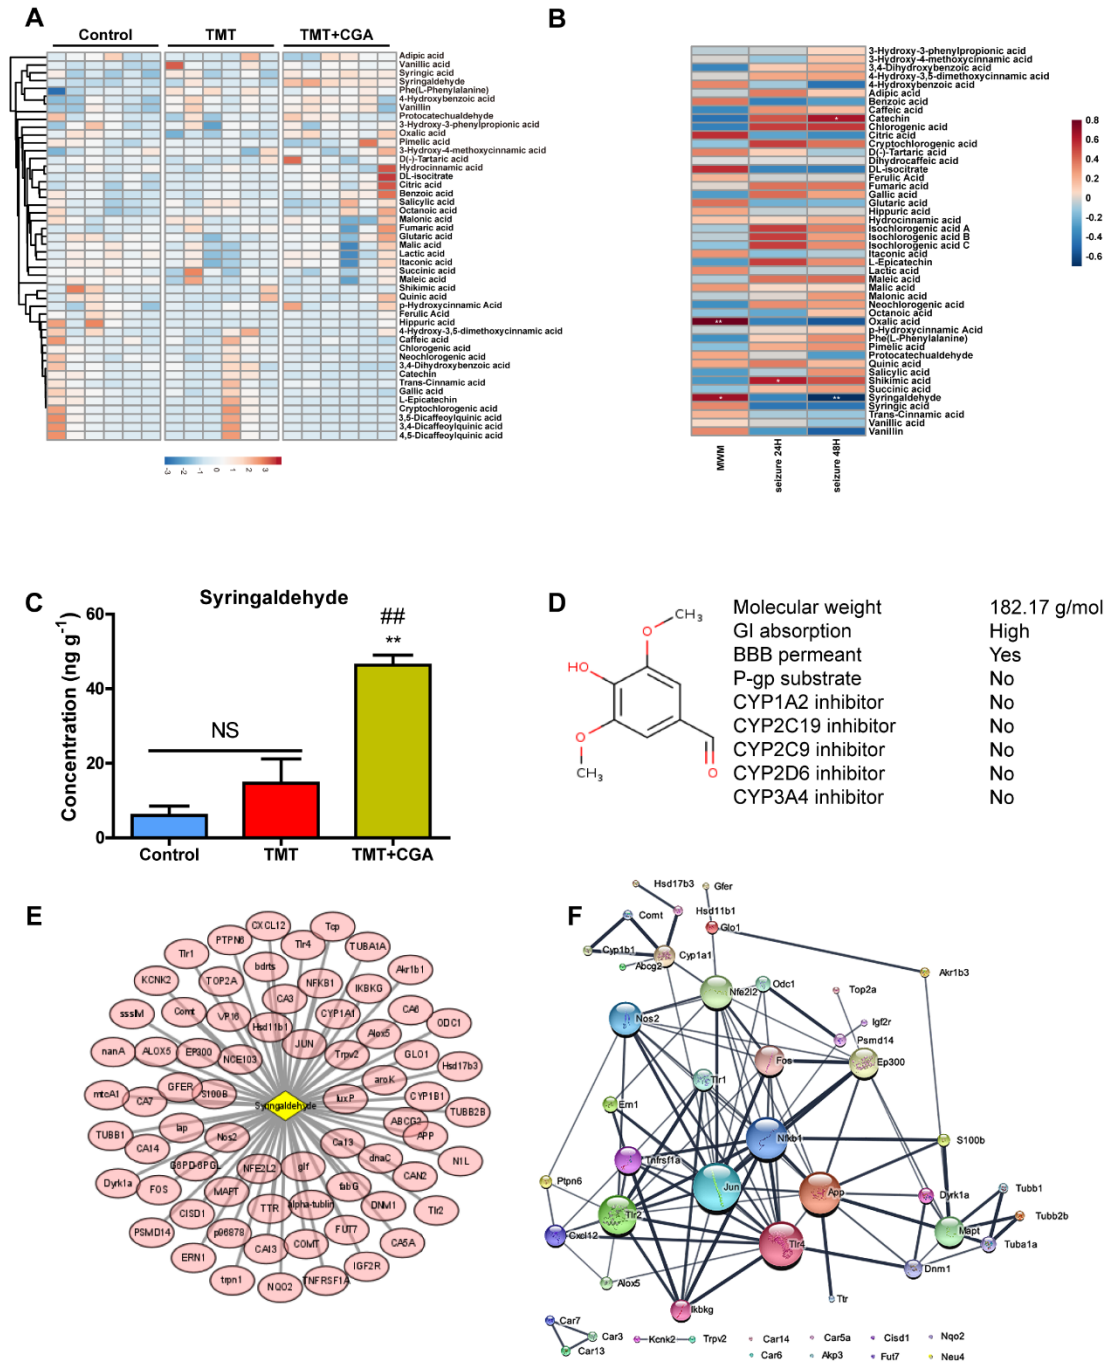

**Figure S3.** Target metabolomics and bioinformatics analysis of CGA metabolites in the mouse brain. (A) Heatmap of CGA metabolites in the hippocampus of mice with different treatments (n=6, per group). Unit variance scaling was used. (B) Correlation analysis between CGA metabolites and neuronal damages. (C) Concentration of syringaldehyde in the hippocampus of mice with different treatments (n=6 per group).

(D) Pharmacokinetics of syringaldehyde by SwissADME (<http://www.swissadme.ch/index.php>). (E) Protein targets prediction of syringaldehyde by SAE database (<https://sea.bkslab.org/>). (F) Protein association network analysis by STRING (<https://string-db.org/>) and Cytoscape software. Correlation analysis was performed using R version 3.6.1 (spearman method),  $*p < 0.05$ ,  $**p < 0.01$ . The values are represented as the mean  $\pm$  SEM.  $**p < 0.01$  vs control group;  $##p < 0.01$  vs TMT group, NS, no significance.

#### References:

- 1 R. Jaiswal, H. Müller, A. Müller, M. G. E. Karar and N. Kuhnert, Identification and characterization of chlorogenic acids, chlorogenic acid glycosides and flavonoids from *Lonicera henryi* L.(Caprifoliaceae) leaves by LC-MSn, *Phytochemistry*, 2014, **108**, 252-263.
- 2 J. Han, K. Lin, C. Sequeira and C. H. Borchers, An isotope-labeled chemical derivatization method for the quantitation of short-chain fatty acids in human feces by liquid chromatography-tandem mass spectrometry, *Anal. Chim. Acta*, 2015, **854**, 86-94.
- 3 G. t. Glauser, B. Grund, A.-L. Gassner, L. Menin, H. Henry, M. Bromirski, F. d. r. Schütz, J. McMullen and B. Rochat, Validation of the mass-extraction-window for quantitative methods using liquid chromatography high resolution mass spectrometry, *Anal. Chem.*, 2016, **88**, 3264-3271.
- 4 L. Zhang, Y. Li, Y. Liang, K. Liang, F. Zhang, T. Xu, M. Wang, H. Song, X. Liu and B. Lu, Determination of phenolic acid profiles by HPLC-MS in vegetables commonly consumed in China, *Food Chem.*, 2019, **276**, 538-546.
- 5 J. Zhuang, X. Dai, M. Zhu, S. Zhang, Q. Dai, X. Jiang, Y. Liu, L. Gao and T. Xia, Evaluation of astringent taste of green tea through mass spectrometry-based targeted metabolic profiling of polyphenols, *Food Chem.*, 2020, **305**, 125507.



- 6 R. Fuertig, A. Ceci, S. M. Camus, E. Bezard, A. H. Luippold and B. Hengerer, LC–MS/MS-based quantification of kynurenine metabolites, tryptophan, monoamines and neopterin in plasma, cerebrospinal fluid and brain, *Bioanalysis*, 2016, **8**, 1903-1917.
- 7 H. Xu, Z. Wang, L. Zhu, Z. Sui, W. Bi, R. Liu, K. Bi and Q. Li, Targeted neurotransmitters profiling identifies metabolic signatures in rat brain by LC-MS/MS: application in insomnia, depression and Alzheimer’s disease, *Molecules*, 2018, **23**, 2375.
- 8 L.-S. Wang, M.-D. Zhang, X. Tao, Y.-F. Zhou, X.-M. Liu, R.-L. Pan, Y.-H. Liao and Q. Chang, LC-MS/MS-based quantification of tryptophan metabolites and neurotransmitters in the serum and brain of mice, *J. Chromatogr. B*, 2019, **1112**, 24-32.
- 9 D. Virág, M. Király, L. Drahos, A. E. Édes, K. Gecse, G. Bagdy, G. Juhász, I. Antal, I. Klebovich and B. D. Kiss, Development, validation and application of LC-MS/MS method for quantification of amino acids, kynurenine and serotonin in human plasma, *J. Pharmaceut. Biomed.*, 2020, **180**, 113018.
